# Supplementary material for: Exploring the processes controlling secondary inorganic aerosol: evaluating the global GEOS-Chem simulation using a suite of aircraft campaigns
Source: Copernicus journal article supplement (doi:10.5194/acp-25-771-2025), 2025-01-21
Supplement: Supplementary file 1 [file acp-25-771-2025-supplement.pdf]

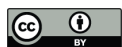

*Supplement of*

## **Exploring the processes controlling secondary inorganic aerosol: evaluating the global GEOS-Chem simulation using a suite of aircraft campaigns**

**Olivia G. Norman et al.**

*Correspondence to:* Olivia G. Norman (onorman@mit.edu) and Colette L. Heald (colette.heald@env.ethz.ch)

The copyright of individual parts of the supplement might differ from the article licence.

**Table S1.** Complete list of instruments and associated PI for all species data included in this paper across all the campaigns.

|                       | <b>SNA + Cl<sup>-</sup></b>                                                         | <b>HNO<sub>3</sub></b>                                                       | <b>NH<sub>3</sub></b>                         | <b>SO<sub>2</sub></b>                                                                     | <b>HCl</b>                                                  | <b>Na<sup>+</sup></b>        |
|-----------------------|-------------------------------------------------------------------------------------|------------------------------------------------------------------------------|-----------------------------------------------|-------------------------------------------------------------------------------------------|-------------------------------------------------------------|------------------------------|
| <b>ADRIEX</b>         | Hugh Coe<br>(Q-AMS)                                                                 | -                                                                            | -                                             | -                                                                                         | -                                                           | -                            |
| <b>MILAGRO</b>        | Jose L. Jimenez<br>(HR-ToF-AMS)                                                     | Paul Wennberg,<br>John Crouse<br>(CIT CIMS)                                  | -                                             | Paul Wennberg,<br>John Crouse<br>(CIT CIMS)                                               | -                                                           | Rodney<br>Weber<br>(PILS-IC) |
| <b>EUCAARI</b>        | Hugh Coe<br>(C-ToF-AMS)                                                             | -                                                                            | -                                             | -                                                                                         | -                                                           | -                            |
| <b>CalNex</b>         | Ann Middlebrook,<br>Roya Bahreini (C-<br>ToF-AMS)                                   | Andy Neuman,<br>John B. Nowak<br>(CIMS)                                      | John B.<br>Nowak,<br>Andy<br>Neuman<br>(CIMS) | John S<br>Holloway<br>(UV Pulsed<br>Fluorescence)                                         | Greg<br>Huey<br>(GT<br>CIMS)                                | -                            |
| <b>DC3</b>            | Jose L. Jimenez<br>(HR-ToF-AMS)                                                     | Paul Wennberg,<br>John Crouse<br>(CIT CIMS)                                  | -                                             | Greg Huey (GT<br>CIMS)                                                                    | -                                                           | Jack Dibb<br>(SAGA-<br>AERO) |
| <b>SENEX</b>          | Ann Middlebrook,<br>Jin Liao, Andre<br>Welti (C-ToF-<br>AMS)                        | Andy Neuman,<br>John B. Nowak<br>(CIMS)                                      | John B.<br>Nowak,<br>Andy<br>Neuman<br>(CIMS) | John S<br>Holloway<br>(UV Pulsed<br>Fluorescence)                                         | -                                                           | -                            |
| <b>WINTER</b>         | Jose L. Jimenez,<br>Pedro Campuzano-<br>Jost (HR-ToF-<br>AMS)                       | Joel Thornton,<br>Felipe Lopez-<br>Hilfiker<br>(CIMS)                        | -                                             | Marc N. Fiddler,<br>Jaime R. Green,<br>Solomon<br>Bililign<br>(UV Pulsed<br>Fluorescence) | Joel<br>Thornton,<br>Felipe<br>Lopez-<br>Hilfiker<br>(CIMS) | -                            |
| <b>KORUS-<br/>AQ</b>  | Jose L. Jimenez,<br>Pedro Campuzano-<br>Jost, Benjamin A.<br>Nault (HR-ToF-<br>AMS) | Paul Wennberg,<br>John Crouse,<br>Michelle Kim<br>(CIT CIMS)                 | -                                             | Greg Huey (GT<br>CIMS)                                                                    | Greg<br>Huey<br>(GT<br>CIMS)                                | Jack Dibb<br>(SAGA-<br>AERO) |
| <b>EMeRGe-<br/>EU</b> | Johannes<br>Schneider, Stephan<br>Borrmann,<br>Katharina Kaiser<br>(C-ToF-AMS)      | -                                                                            | -                                             | Hans Schlager,<br>Lisa<br>Eirenschmalz<br>(CIMS)                                          | -                                                           | -                            |
| <b>EMeRGe-<br/>AS</b> | Johannes<br>Schneider, Stephan<br>Borrmann,<br>Katharina Kaiser<br>(C-ToF-AMS)      | -                                                                            | -                                             | Hans Schlager,<br>Lisa<br>Eirenschmalz<br>(CIMS)                                          | -                                                           | -                            |
| <b>FIREX-AQ</b>       | Jose L. Jimenez,<br>Pedro Campuzano-<br>Jost, Benjamin A.<br>Nault (HR-ToF-<br>AMS) | Paul Wennberg,<br>John Crouse,<br>Krystal<br>Vasquez, Lu<br>Xu (CIT<br>CIMS) | -                                             | Andrew Rollins<br>(LIF)                                                                   | -                                                           | Jack Dibb<br>(SAGA-<br>AERO) |

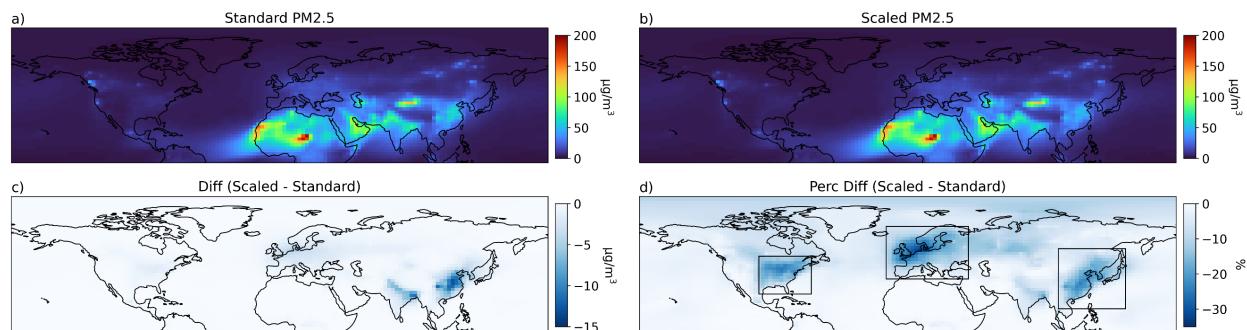

**Figure S1.** Annual average  $PM_{2.5}$  concentrations in the Northern Hemisphere for a) the standard GEOS-Chem simulation and b) for the sensitivity test where  $NO_3^-$  is scaled down by a NMB of 1.76. The difference (c) and percent difference (d) between  $PM_{2.5}$  concentrations in the scaled and the standard simulation are also shown. Outlined in d) are the three regions with the largest decreases in  $PM_{2.5}$ .

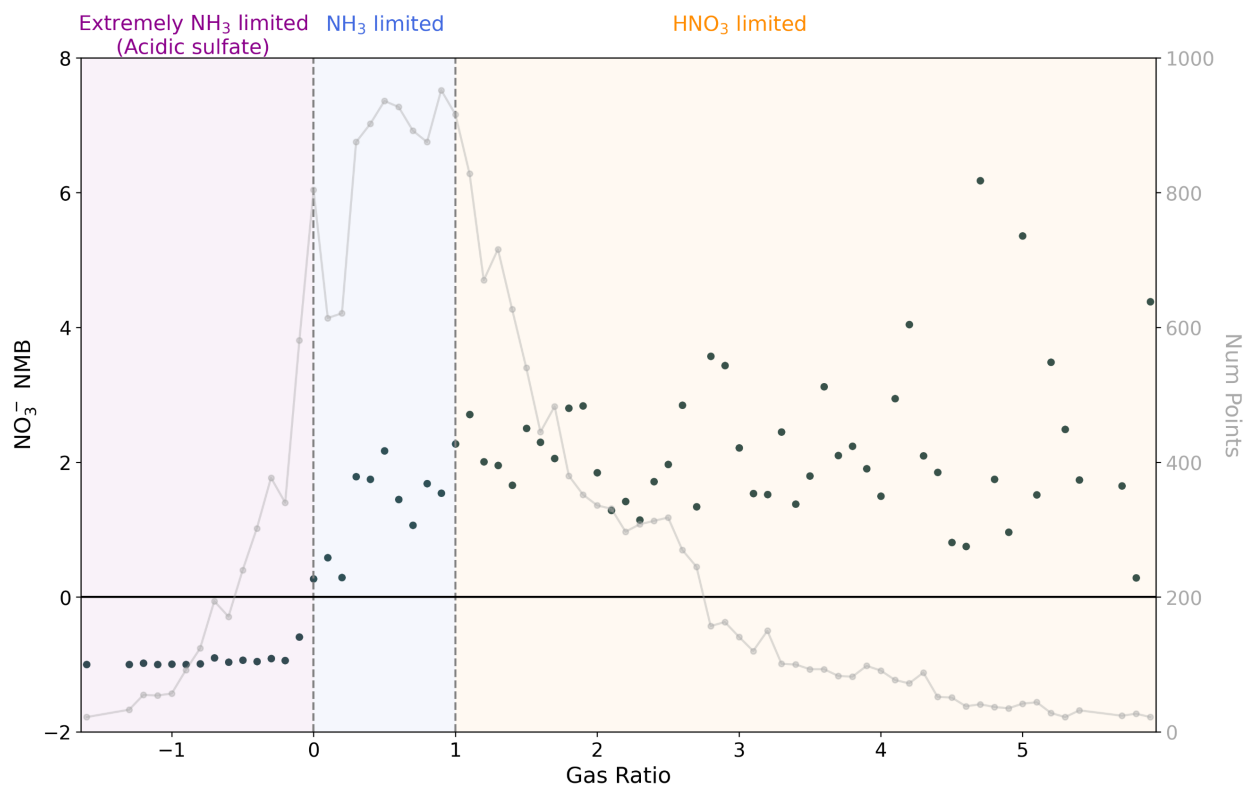

**Figure S2.** NMB for nitrate concentrations versus gas ratio (points). The number of points in each bin is also shown (line), with bins with less than 20 data points filtered out. The three regimes (extreme  $NH_3$  limitation,  $NH_3$  limitation, and  $HNO_3$  limitation) are indicated.

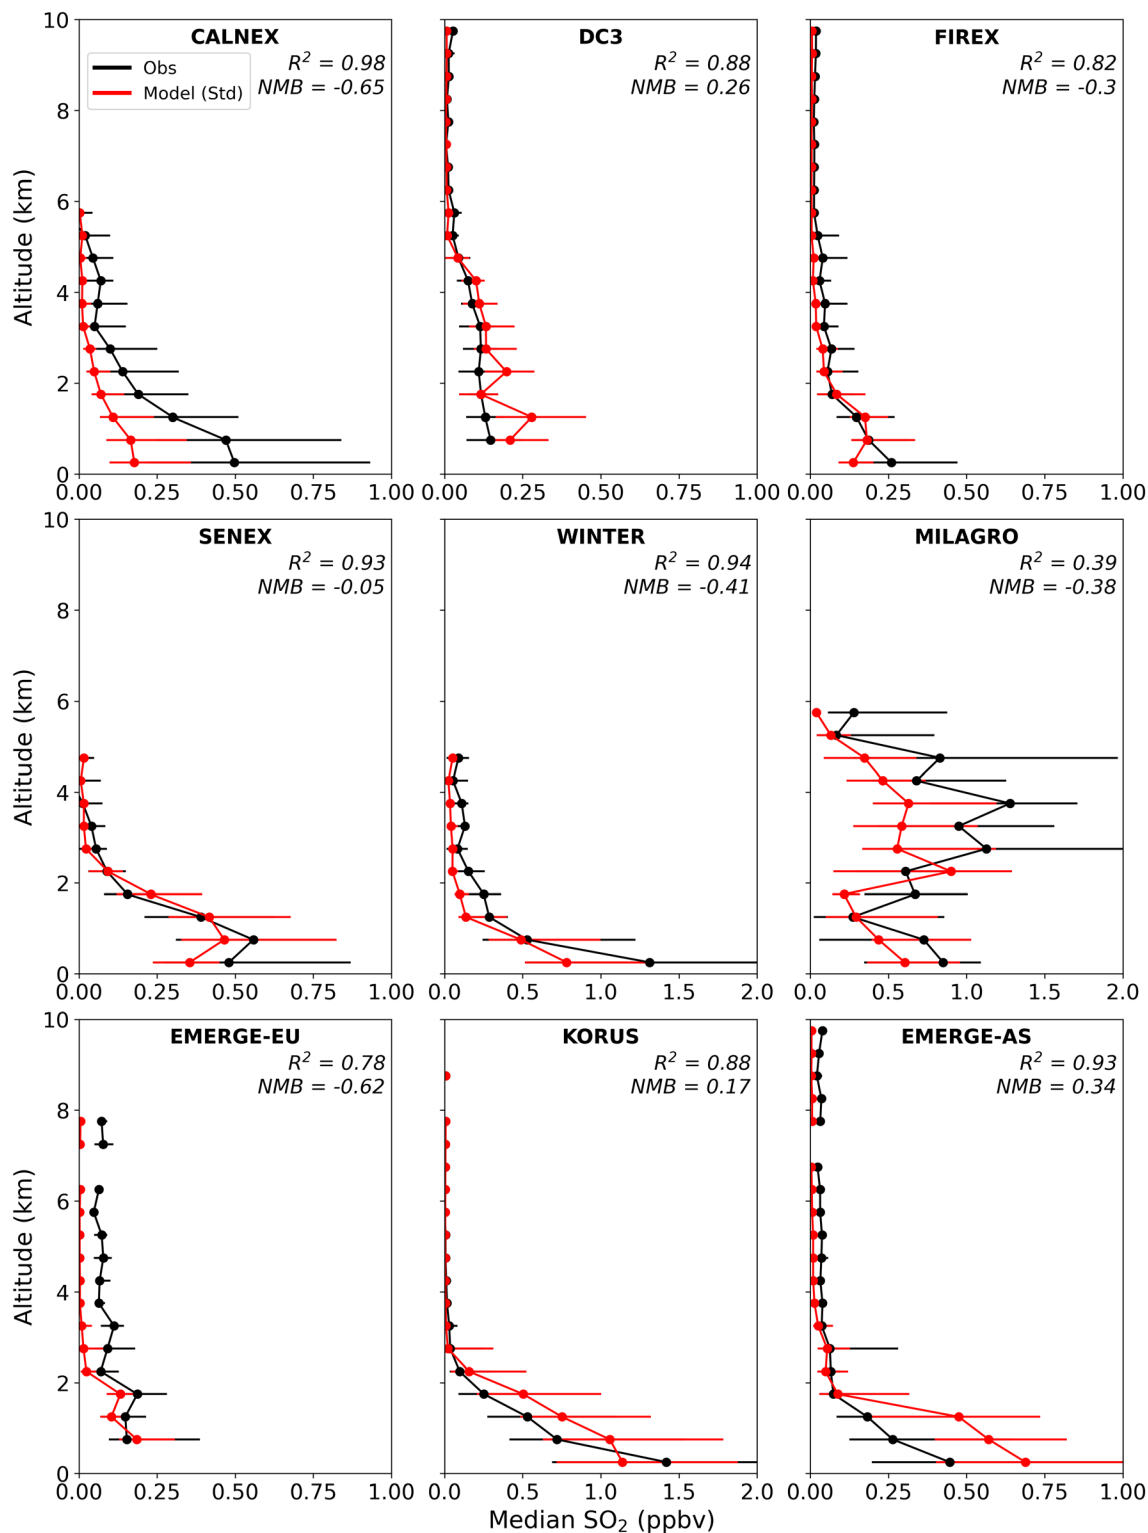

**Figure S3.** Median vertical profile of observed (black) and simulated (red) SO<sub>2</sub> concentrations. Points are binned to the nearest 0.5 km. Error bars represent the interquartile range (IQR). Altitude bins with less than 10 points per bin are not shown.  $R^2$  and NMB for the vertical variability is also reported for each campaign.

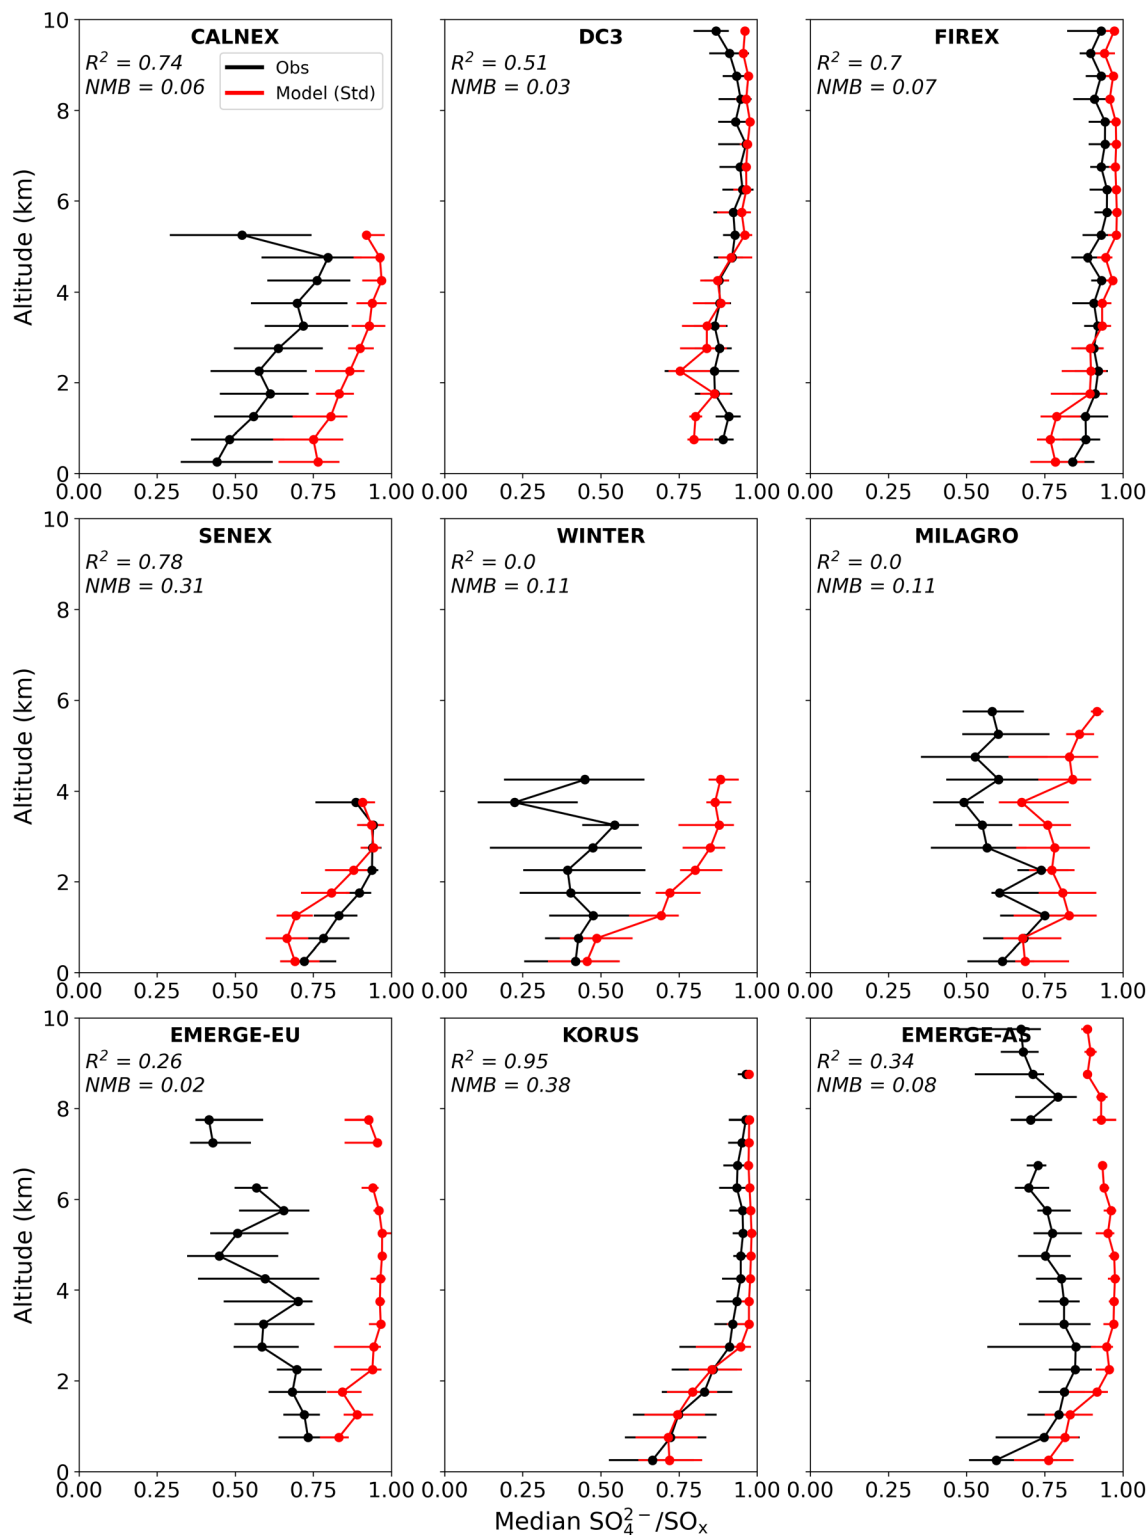

**Figure S4.** Median vertical profile of observed (black) and simulated (red) of the molar ratio  $\text{SO}_4^{2-}/\text{SO}_x$ . Points are binned to the nearest 0.5 km. Error bars represent the interquartile range (IQR). Altitude bins with less than 10 points per bin are not shown.  $R^2$  and NMB for the vertical variability is also reported for each campaign. Points with missing or negative  $\text{SO}_4^{2-}$  and  $\text{SO}_2$  are removed.

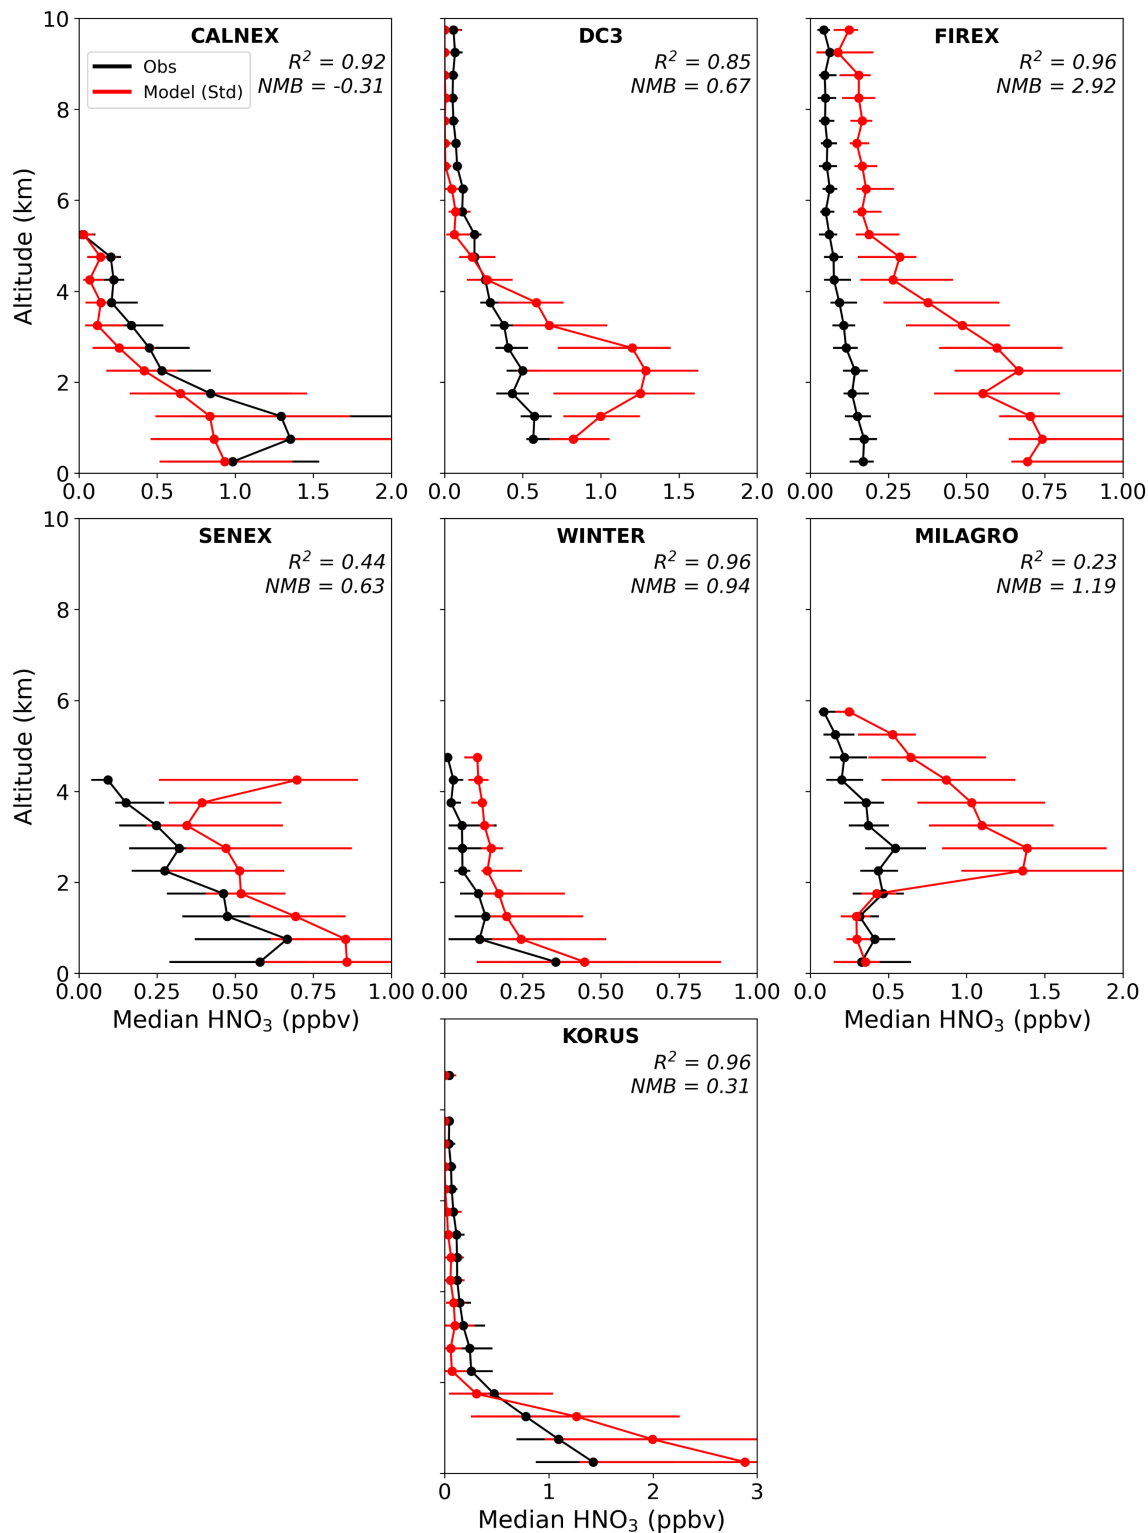

**Figure S5.** Median vertical profile of observed (black) and simulated (red)  $\text{HNO}_3$  concentrations. Points are binned to the nearest 0.5 km. Error bars represent the interquartile range (IQR). Altitude bins with less than 10 points per bin are not shown.  $R^2$  and NMB for the vertical variability is also reported for each campaign.

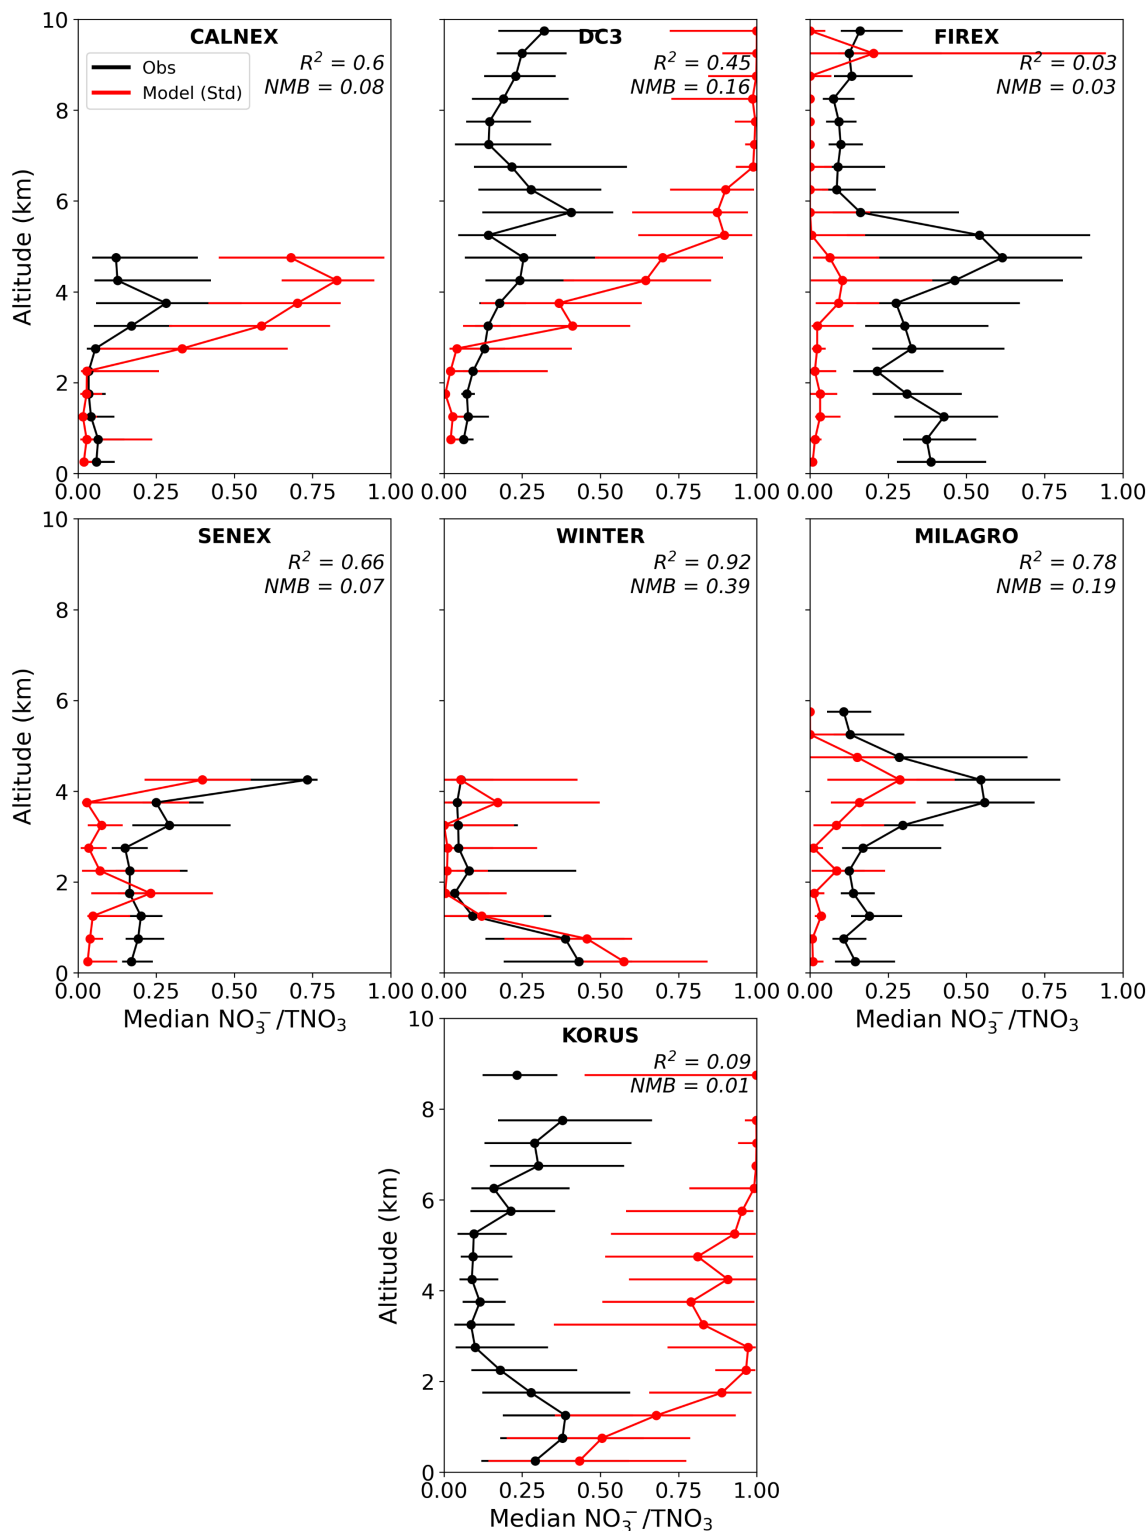

**Figure S6.** Median vertical profile of observed (black) and simulated (red) of the molar ratio  $\text{NO}_3^-/\text{TNO}_3$ . Points are binned to the nearest 0.5 km. Error bars represent the interquartile range (IQR). Altitude bins with less than 10 points per bin are not shown.  $R^2$  and NMB for the vertical variability is also reported for each campaign. Points with missing or negative  $\text{NO}_3^-$  and  $\text{HNO}_3$  are removed.

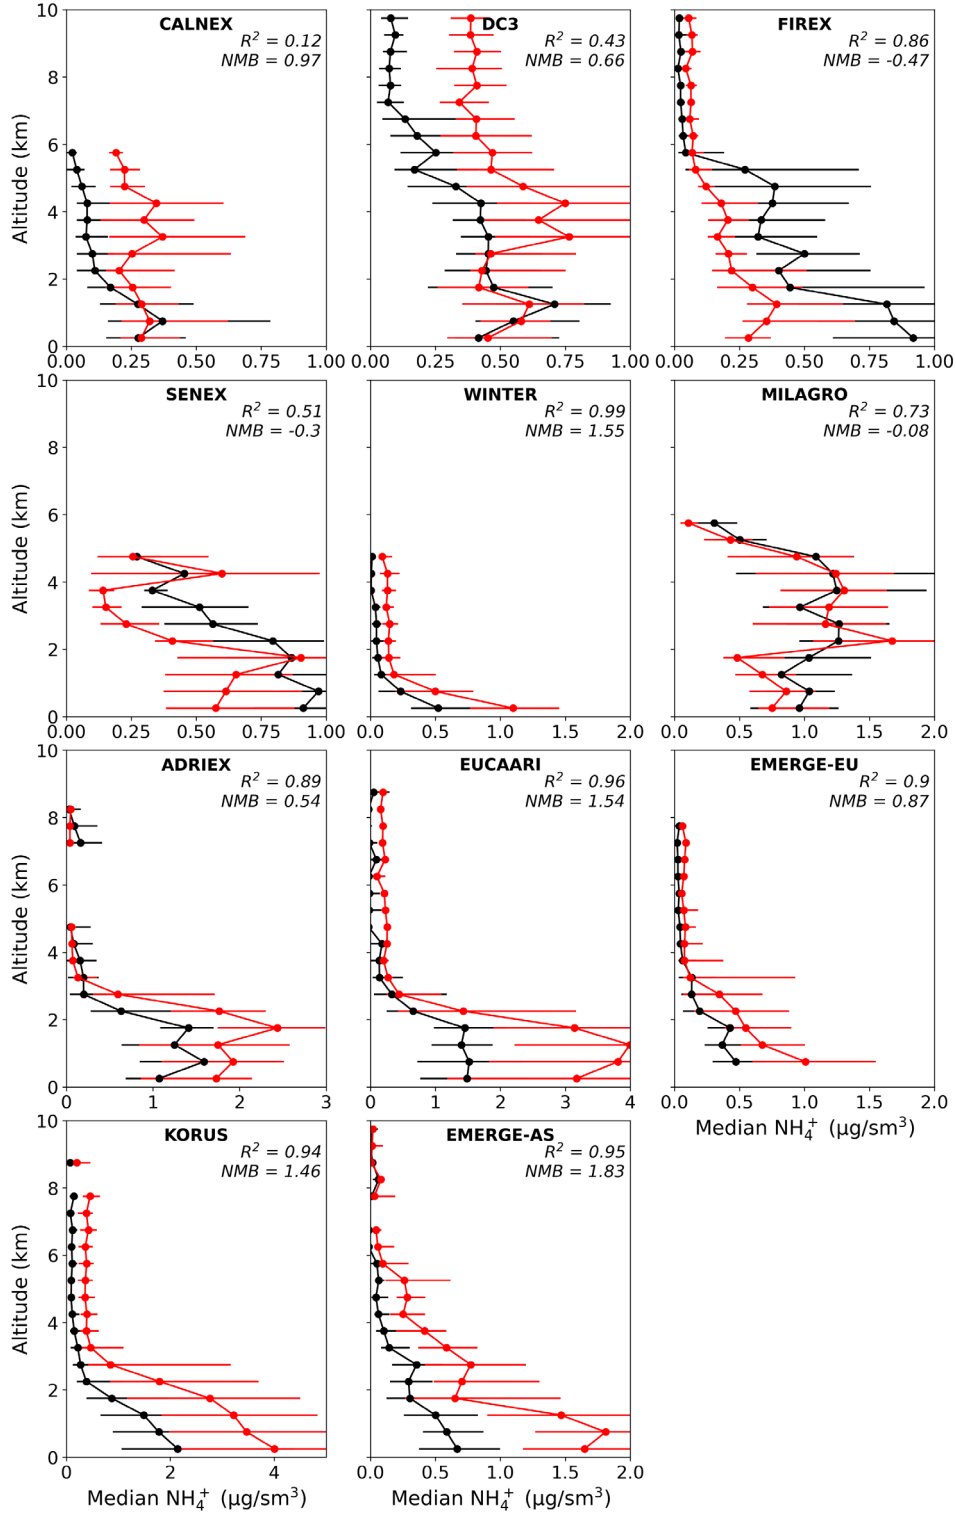

**Figure S7.** Median vertical profile of observed (black) and simulated (red) ammonium concentrations. Points are binned to the nearest 0.5 km. Error bars represent the interquartile range (IQR). Altitude bins with less than 10 points per bin are not shown.  $R^2$  and NMB for the vertical variability is also reported for each campaign.



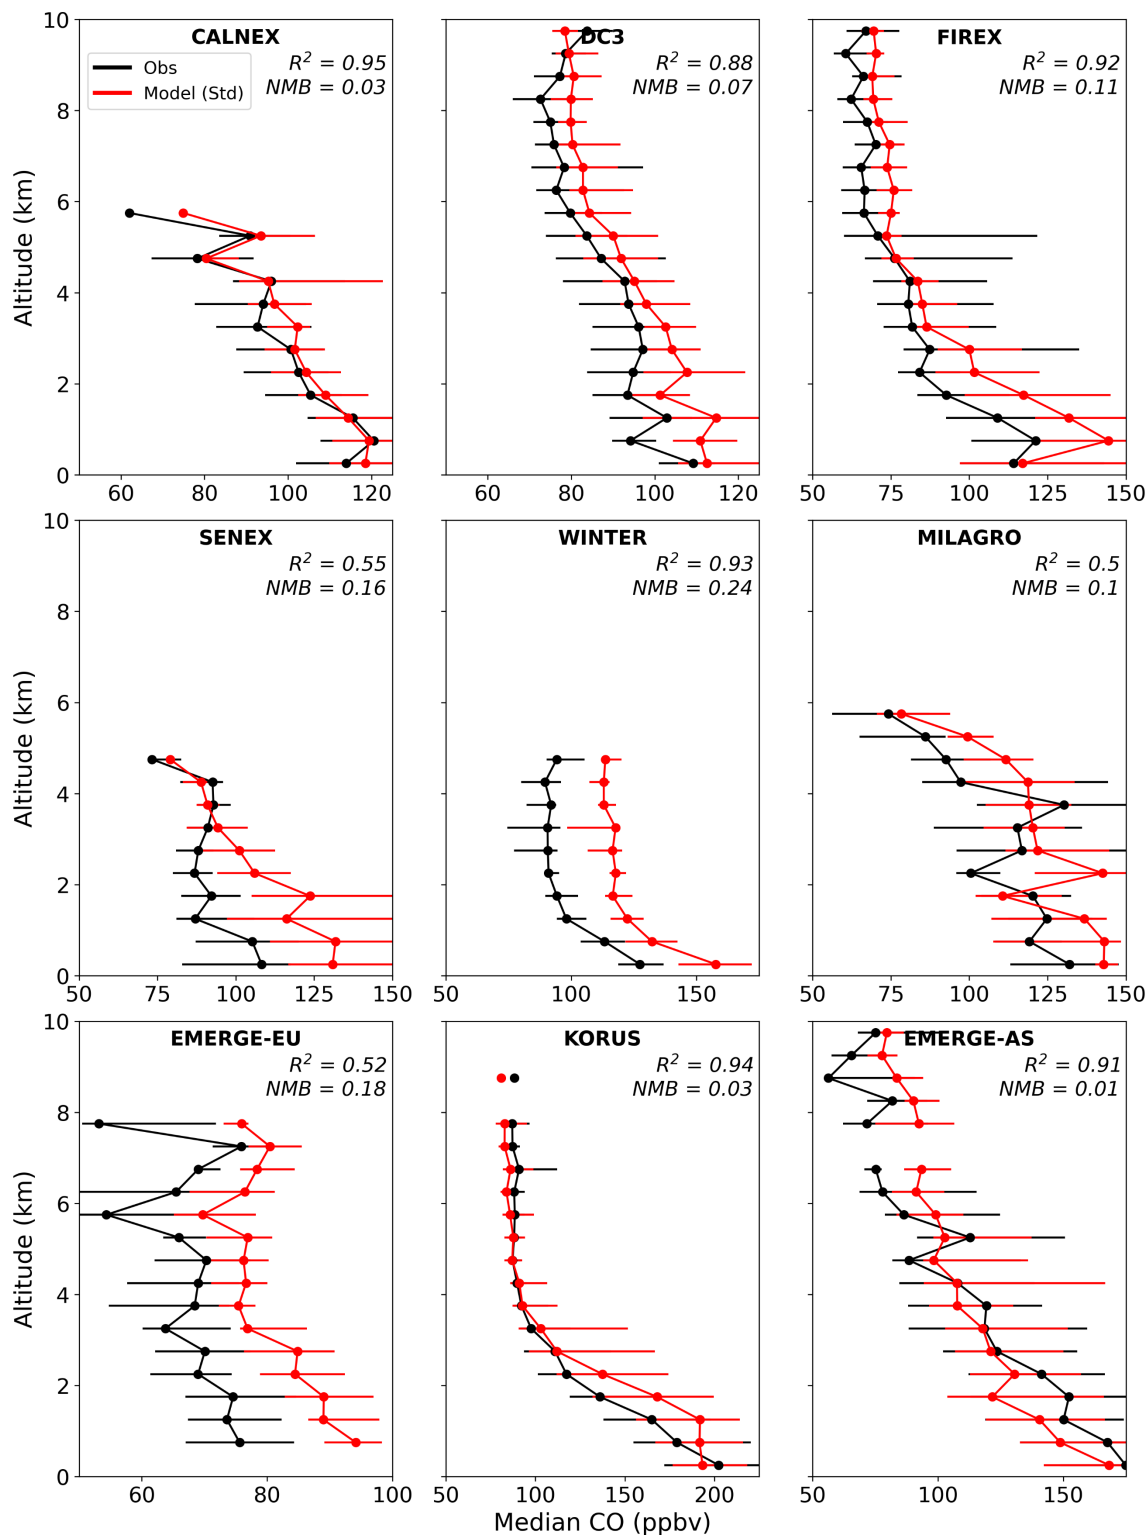

**Figure S8.** Median vertical profile of observed (black) and simulated (red) CO concentrations. Points are binned to the nearest 0.5 km. Error bars represent the interquartile range (IQR). Altitude bins with less than 10 points per bin are not shown.  $R^2$  and NMB for the vertical variability is also reported for each campaign.

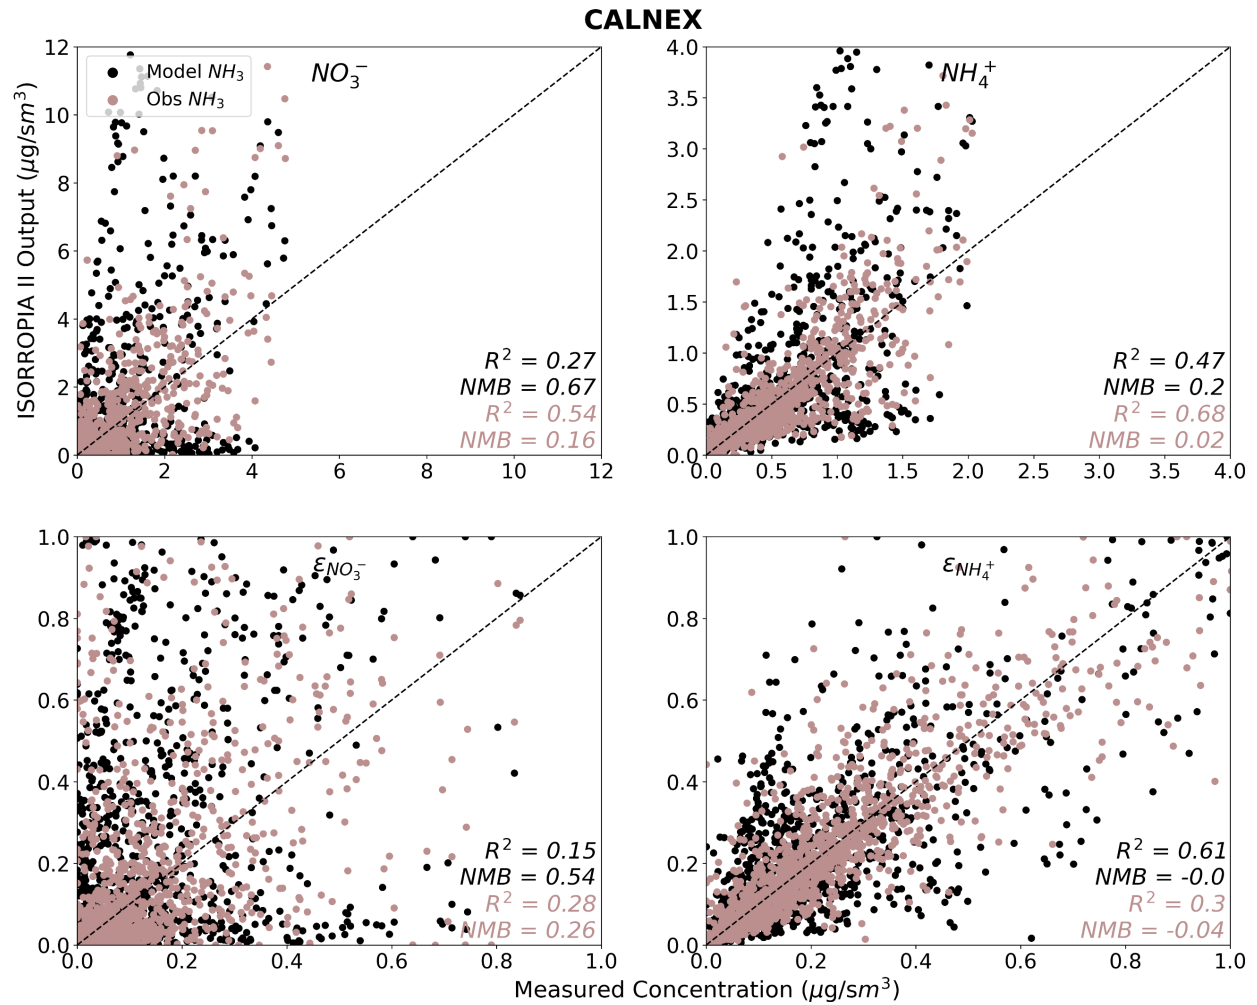

**Figure S9.** Comparison of the expected (x-axis) to ISORROPIA II-predicted (y-axis)  $\text{NO}_3^-$ ,  $\text{NH}_4^+$ ,  $\epsilon(\text{NO}_3^-)$ , and  $\epsilon(\text{NH}_4^+)$  for CalNex data when model  $\text{NH}_3$  (black) and observed  $\text{NH}_3$  (brown) are used as input into ISORROPIA II. Observations of T, RH,  $\text{SO}_4^{2-}$ ,  $\text{NO}_3^-$ ,  $\text{NH}_4^+$ ,  $\text{HNO}_3$ , and Cl are also used as inputs into ISORROPIA II. Data is filtered to retain points where model T < 300 K and  $15 \leq \text{model RH} < 90\%$

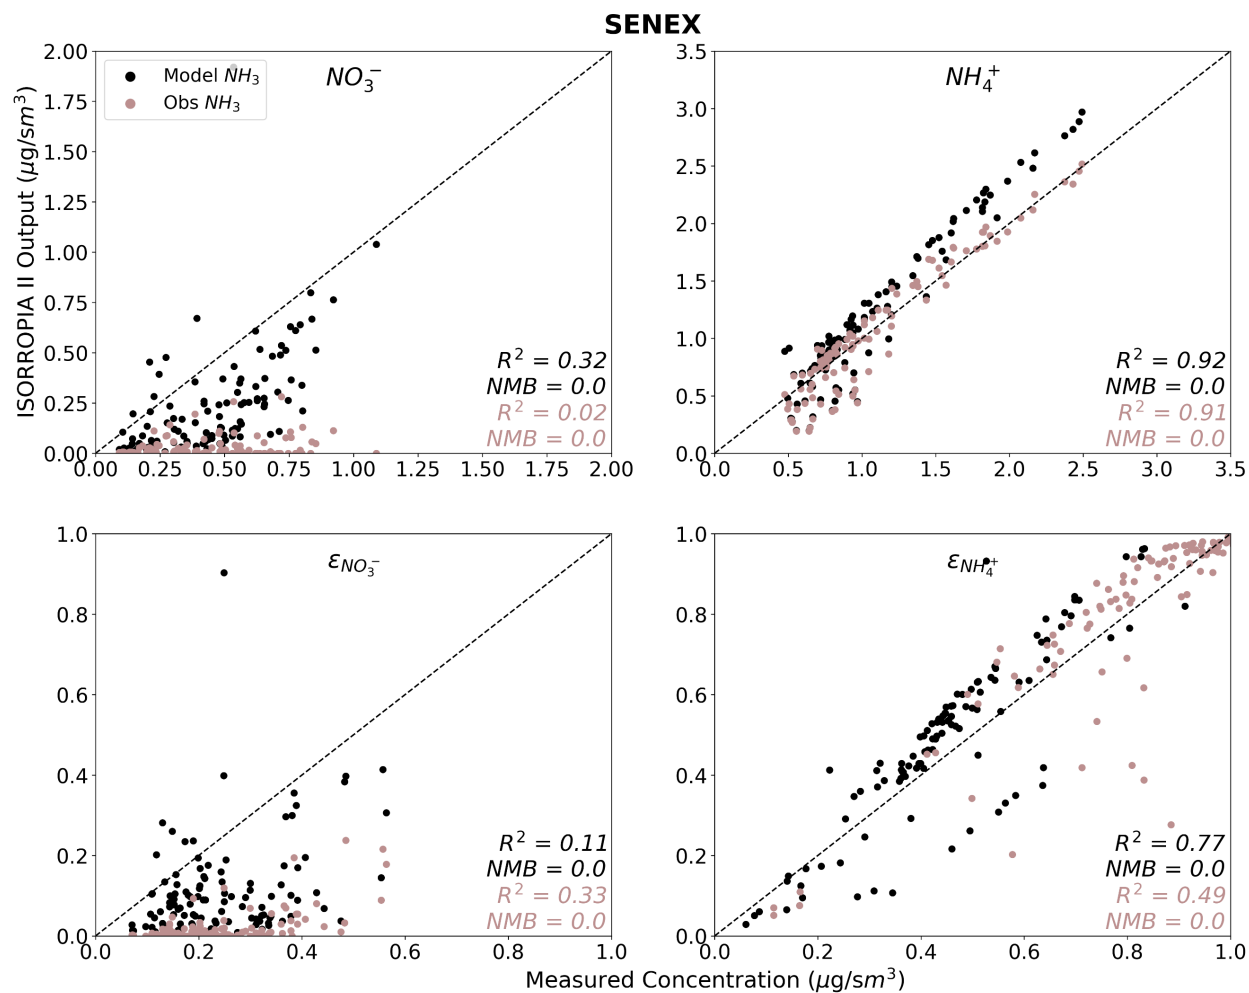

**Figure S10.** Comparison of the expected (x-axis) to ISORROPIA II-predicted (y-axis)  $\text{NO}_3^-$ ,  $\text{NH}_4^+$ ,  $\epsilon(\text{NO}_3^-)$ , and  $\epsilon(\text{NH}_4^+)$  for SENEX data when model  $\text{NH}_3$  (black) and observed  $\text{NH}_3$  (brown) are used as input into ISORROPIA II. Observations of T, RH,  $\text{SO}_4^{2-}$ ,  $\text{NO}_3^-$ ,  $\text{NH}_4^+$ ,  $\text{HNO}_3$ , and  $\text{Cl}^-$  are also used as inputs into ISORROPIA II. Data is filtered to retain points where model T < 300 K and  $15 \leq \text{model RH} < 90\%$ .

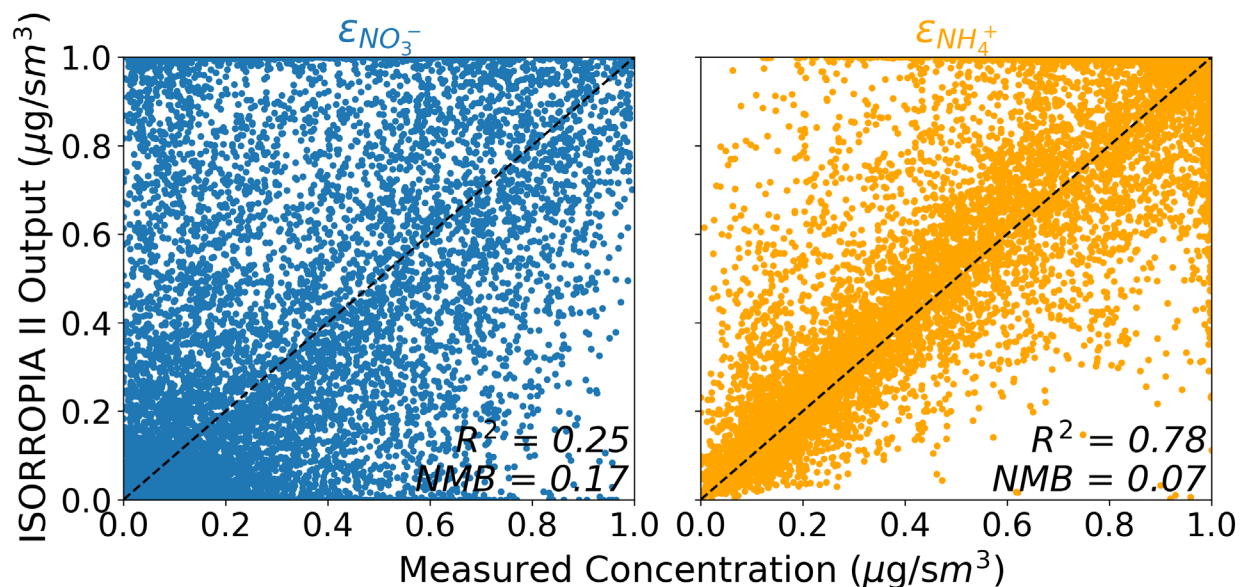

**Figure S11.** Comparison of the expected (x-axis) to ISORROPIA II-predicted (y-axis)  $\epsilon(\text{NO}_3^-)$  and  $\epsilon(\text{NH}_4^+)$ . Observations of T, RH,  $\text{SO}_4^{2-}$ ,  $\text{NO}_3^-$ ,  $\text{NH}_4^+$ ,  $\text{HNO}_3$ , and  $\text{Cl}^-$  are used as inputs into ISORROPIA II. Only the campaigns that made measurements of these inputs are represented. Data is filtered to retain points where model T < 300 K and  $15 \leq \text{model RH} < 90\%$ .

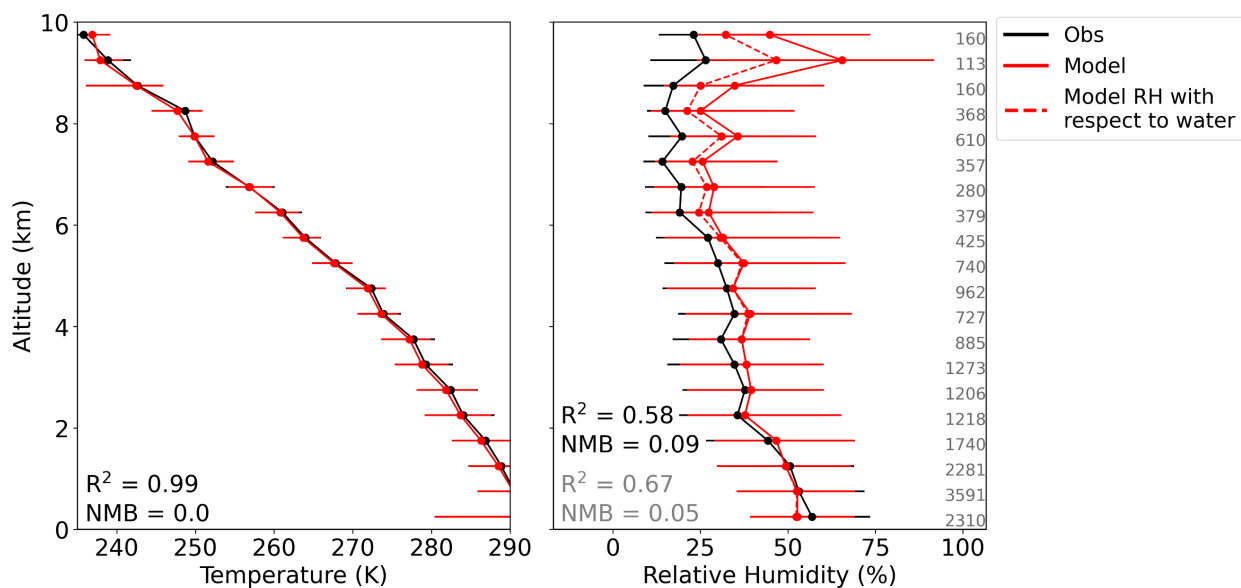

**Figure S12.** Temperature and RH vertical profiles for all the campaigns combined for observations (black) and model (red, solid). Model RH refers to the default RH in the model (with respect to both ice and/or water depending on the temperature). Calculated model RH with respect to only water, matching the observed RH definition, is shown with the red, dashed line. The number of points per each 0.5km altitude bin is on the right edge.  $R^2$  and NMB are reported for each.

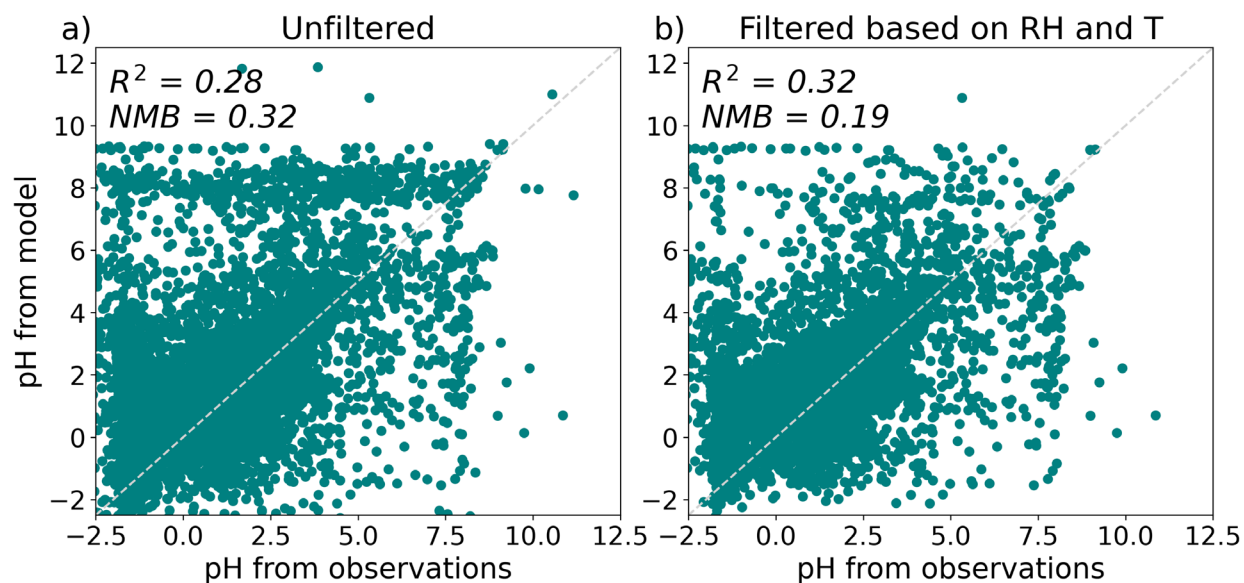

**Figure S13.** pH calculated using all available observed values (i.e. SNA, HNO<sub>3</sub>, Na<sup>+</sup>, RH, temperature, Cl<sup>-</sup>) and using model values from GEOS-Chem as an input to standalone ISORROPIA II. Agreement between pH from observations and model is calculated a) without any filtering and b) after filtering points to remove T > 300 K and 15 ≤ RH < 90%.

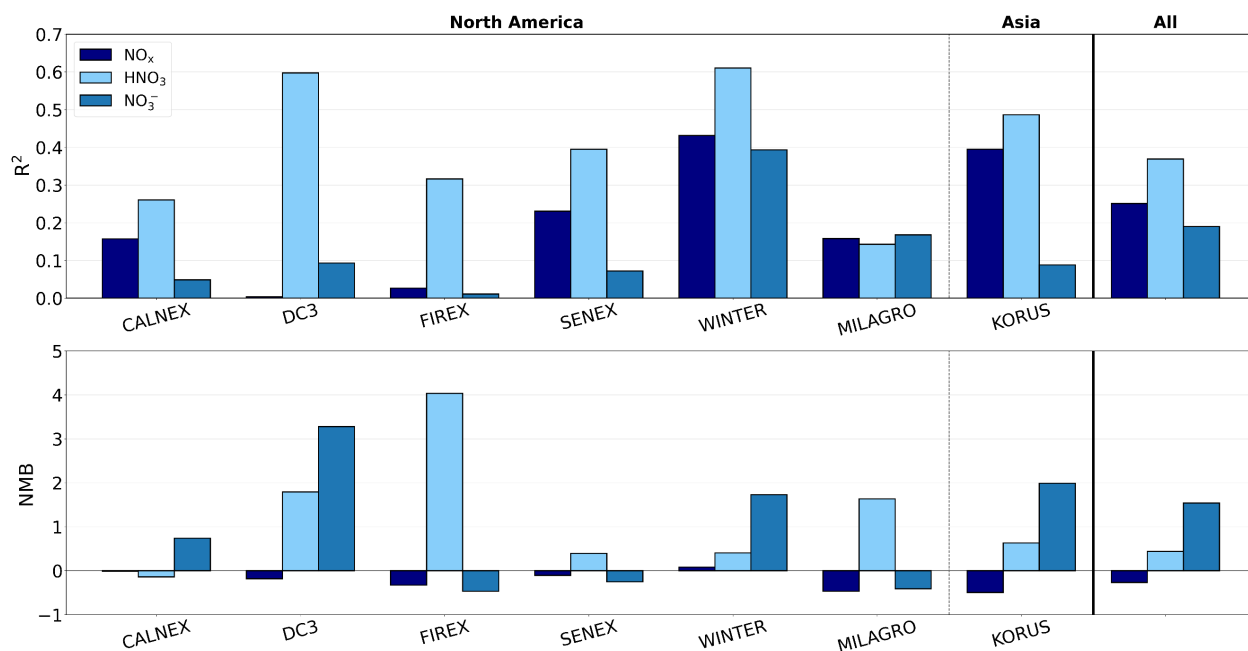

**Figure S14.** GEOS-Chem model performance evaluated against each airborne campaign for NO<sub>x</sub>, HNO<sub>3</sub>, and NO<sub>3</sub><sup>-</sup> reported as R<sup>2</sup> and NMB. Only campaigns with that measured NO, NO<sub>2</sub>, HNO<sub>3</sub>, and NO<sub>3</sub><sup>-</sup> are included. Campaigns are grouped by the general regions examined in this study. Model performance for all the campaigns merged into one dataset is shown under ‘All’.
